# Supplementary material for: Uniform core–shell Cu6Sn5@C nanospheres with controllable synthesis and excellent lithium storage performances
Source: Royal Society of Chemistry journal article supplement (doi:10.1039/c7ra02214j), 2017-01-01
Supplement: c7ra02214j1.pdf [file c7ra02214j1.pdf]

Supplementary Information

**Uniform Core-shell Cu<sub>6</sub>Sn<sub>5</sub>@C Nanospheres with Controllable  
Synthesis and Excellent Lithium Storage Performances**

*Liwei Su,<sup>a</sup> Jianghao Fu<sup>a</sup>, Pinjie Zhang<sup>b</sup>, Lianbang Wang,<sup>a,\*</sup> Yuanhao Wang,<sup>c,\*</sup> and*

*Manman Ren<sup>d</sup>*

<sup>a</sup> State Key Laboratory Breeding Base of Green Chemistry-Synthesis Technology,  
College of Chemical Engineering, Zhejiang University of Technology, Hangzhou  
310014, China

<sup>b</sup> Juhua Group Technology Center, Quzhou 324004, China

<sup>c</sup> Xinjiang Technical Institute of Physics & Chemistry, Chinese Academy of Sciences,  
Urumqi, 830011, China

<sup>d</sup> Institute of Materials Science and Engineering, Qilu University of Technology, Jinan  
250353, China.

\*Corresponding authors. Tel.: +86 571 88320611; fax: +86 571 88320832.

E-mail: wanglb99@zjut.edu.cn (L. Wang), yuanhaowang@yahoo.com (Y. Wang)

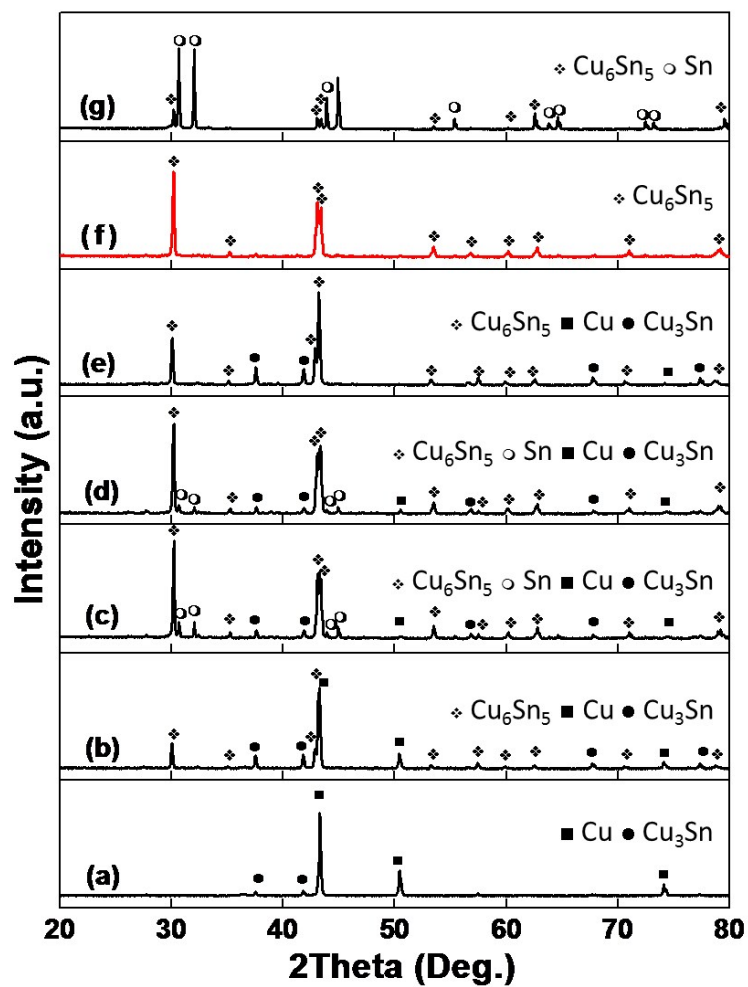

**Figure S1.** XRD patterns of Cu-Sn@C nanospheres synthesized with various Sn:Cu ratios (a-g) subjected to a heat-treatment at 300°C (■ Cu, ● Cu<sub>3</sub>Sn, ♦ Cu<sub>6</sub>Sn<sub>5</sub>, ○ Sn).

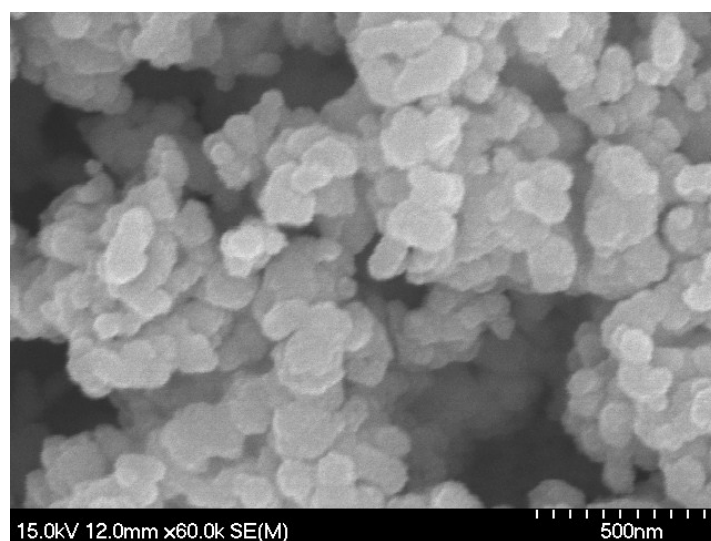

**Figure S2.** SEM image of the resultant core-shell Cu<sub>6</sub>Sn<sub>5</sub>@C nanospheres.

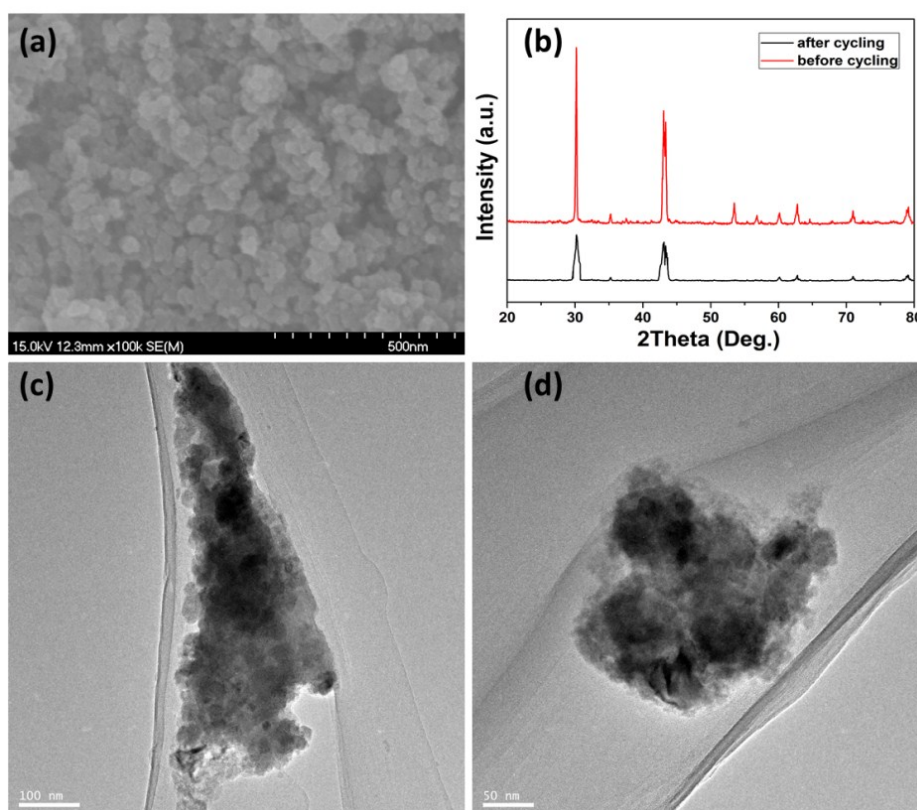

**Figure S3.** (a) SEM image, (b) XRD patterns, and (c, d) TEM images of  $\text{Cu}_6\text{Sn}_5@\text{C}$  electrodes after 30 cycles at 0.2C.

SEM, XRD, and TEM were carried out to investigate the structural and morphology change of the  $\text{Cu}_6\text{Sn}_5@\text{C}$  electrodes after 30 cycles at 0.2C (**Figure S3**). SEM image (**Figure S3a**) shows that the  $\text{Cu}_6\text{Sn}_5@\text{C}$  also keeps the relatively good distribution with a diameter of approximately 50 nm. TEM images (**Figure S3c**) can further confirm the core-shell structure of  $\text{Cu}_6\text{Sn}_5$  (dark region) and carbon (gray region), although the nanoparticles agglomerate into larger particles to some extent. The tight contact between the core-shell particles can be clearly observed in **Figure S3d**. Note that, the small carbon nanoparticles (gray region) surrounding the  $\text{Cu}_6\text{Sn}_5@\text{C}$  particles should be the acetylene black used in assembling into working electrodes. The good structural stability comes from the effective accommodation of Cu and C for huge volume expansion of Sn and hence benefits for the long-term cycling performance. XRD patterns (**Figure S3b**) of  $\text{Cu}_6\text{Sn}_5@\text{C}$  indicate that the crystal phase of  $\text{Cu}_6\text{Sn}_5$  still maintains after 30 cycles, while the weaker and broader reflections manifest a pulverization process of the crystalline during repeated charge/discharge processes.
